# Supplementary material for: Feedstock nitrogen content mediates maximum possible Pb sorption capacity of biochars
Source: Royal Society of Chemistry journal article supplement (doi:10.1039/d3em00246b), 2023-01-01
Supplement: d3em00246b1.pdf [file d3em00246b1.pdf]

## Supporting Information for:

### **Feedstock nitrogen content mediates maximum possible Pb sorption capacity of biochars**

Chinonso Ogbuagu<sup>1</sup>, Steve Robinson<sup>1</sup>, and Tom Sizmur<sup>1</sup>

<sup>1</sup>Soil Research Centre, Department of Geography and Environmental Science, University of Reading

This Supporting Information file contains text and references describing the assignment of FTIR peaks to functional groups, 4 Tables and 5 Figures:

**Table S-1. Functional groups observed in the Fourier-transform infrared (FTIR) spectra of biochars produced at different pyrolysis temperatures**

**Table SI-2. Final pH of solutions after sorption**

**Table S-3. Biochar feedstock properties**

**Table S-4. The relationship between biochar feedstock properties and maximum possible Pb sorption capacity at optimum pyrolysis temperature**

**Figure S-1; Sorption isotherm for hay biochars pyrolyzed at 300 °C, 350 °C, 400 °C, 450 °C, 500 °C, 550 °C, 600 °C, 650 °C, 700 °C, and 750 °C shaken with 100, 200, 500, 1000, and 5000 mg/L of Pb and fitted to a Langmuir sorption isotherm model**

**Figure S-2; Sorption isotherm for wheat straw biochars pyrolyzed at 300 °C, 350 °C, 400 °C, 450 °C, 500 °C, 550 °C, 600 °C, 650 °C, 700 °C, and 750 °C shaken with 100, 200, 500, 1000, and 5000 mg/L of Pb and fitted to a Langmuir sorption isotherm model**

**Figure S-3; Sorption isotherm for coco coir biochars pyrolyzed at 300 °C, 350 °C, 400 °C, 450 °C, 500 °C, 550 °C, 600 °C, 650 °C, 700 °C, and 750 °C shaken with 100, 200, 500, 1000, and 5000 mg/L of Pb and fitted to a Langmuir sorption isotherm model**

**Figure S-4; Sorption isotherm for pine bark biochars pyrolyzed at 300 °C, 350 °C, 400 °C, 450 °C, 500 °C, 550 °C, 600 °C, 650 °C, 700 °C, and 750 °C shaken with 100, 200, 500, 1000, and 5000 mg/L of Pb and fitted to a Langmuir sorption isotherm model**

**Figure S-5. FTIR spectra for feedstocks (FD) and biochars made from coco coir (CC), hay, wheat straw (WS), and pine bark (PB) at pyrolysis temperatures between 300°C and 750°C**

## Assignment of FTIR (Fourier-transform infrared) spectroscopy peaks to functional groups

The peaks observed at  $3380\text{ cm}^{-1}$  were attributed to O-H stretching which may belong to the hydroxyl, alcohol, carboxylic acid, and water groups (Figueredo et al., 2018; Keiluweit et al., 2010). The peaks around  $2940\text{ cm}^{-1}$  were attributed to vibrations of asymmetric and symmetric aliphatic C-H stretching (Keiluweit et al., 2010; Li et al., 2020; Zhao et al., 2017). The peaks at  $2158\text{ cm}^{-1}$  could be linked to overtones of aromatic ring bonds  $\text{C}\equiv\text{C}$  (Korus et al., 2019). The stretching vibration at  $1590\text{ cm}^{-1}$  could be attributed to aromatic compounds  $\text{C}=\text{C}$  and carbonyl groups  $\text{C}=\text{O}$  (Figueredo et al., 2017; Li et al., 2020). The peaks at  $1416\text{ cm}^{-1}$  could be ascribed to asymmetric deformation vibration of  $\text{CH}_3$  aliphatic group as seen in a study by Li et al., (2020). The peaks which appeared at  $1351\text{ cm}^{-1}$  signify the phenolic stretching vibrations of O-H (Zhao et al., 2017). The stretching at  $1160\text{ cm}^{-1}$  could arise from C-O-C oxygen containing functional group, while the stretching at  $876\text{ cm}^{-1}$  were attributed to the out of plane deformation of aromatic C-H groups (Zhao et al., 2017).

## References

- Figueiredo, C., Lopes, H., Coser, T., Vale, A., Busato, J., Aguiar, N., Novotny, E., Canellas, L., 2018. Influence of pyrolysis temperature on chemical and physical properties of biochar from sewage sludge. *Arch. Agron. Soil Sci.* 64, 881–889. <https://doi.org/10.1080/03650340.2017.1407870>
- Keiluweit, M., Nico, P.S., Johnson, M.G., Kleber, M., 2010. Dynamic Molecular Structure of Plant Biomass-Derived Black Carbon (Biochar). *Environ. Sci. Technol.* 44, 1247–1253. <https://doi.org/10.1021/es9031419>
- Li, B., Liu, D., Lin, D., Xie, X., Wang, S., Xu, H., Wang, J., Huang, Y., Zhang, S., Hu, X., 2020. Changes in Biochar Functional Groups and Its Reactivity after Volatile-Char Interactions during Biomass Pyrolysis. *Energy and Fuels* 34, 14291–14299. <https://doi.org/10.1021/acs.energyfuels.0c03243>
- Zhao, S., Ta, N., Wang, X., 2017. Effect of Temperature on the Structural and Physicochemical Properties of Biochar with Apple Tree Branches as Feedstock Material. <https://doi.org/10.3390/en10091293>
- Korus, A., Szłęk, A., Samson, A., 2019. Physicochemical properties of biochars prepared from raw and acetone-extracted pine wood. *Fuel Process. Technol.* 185, 106–116. <https://doi.org/10.1016/j.fuproc.2018.12.004>

**Table S-1. Functional groups observed in the Fourier-transform infrared (FTIR) spectra of biochars produced at different pyrolysis temperatures**

| FTIR Peak (cm <sup>-1</sup> ) | Functional groups assigned                                                                                                         |
|-------------------------------|------------------------------------------------------------------------------------------------------------------------------------|
| 3380                          | O–H stretching (water, hydrogen-bonded hydroxyl)                                                                                   |
| 2940                          | C–H stretching (aliphatic CH <sub>x</sub> ; 2935-asymmetric), C-H stretching aliphatic CH <sub>x</sub>                             |
| 2158                          | C≡C Overtones of aromatic rings                                                                                                    |
| 1590                          | Aromatic C=C and C=O stretching of conjugated ketones and quinones, aromatic components and C]O of conjugated ketones and quinones |
| 1416                          | Asymmetric deformation vibration of CH <sub>3</sub> , CH <sub>2</sub> added to carboxymethyl cellulose                             |
| 1351                          | in plane bending of phenolic -OH                                                                                                   |
| 1160                          | C-O-C ester groups in cellulose and hemicellulose                                                                                  |
| 876                           | C–H bending (aromatic C–H out-of-plane deformation), C=C polycyclic aromatic structures                                            |

**Table SI-2. Final pH of solutions after sorption**

| Biochar Feedstock | Pyrolysis temp (°C) | 100 mg Pb L <sup>-1</sup> | 200 mg Pb L <sup>-1</sup> | 500 mg Pb L <sup>-1</sup> | 1000 mg Pb L <sup>-1</sup> | 5000 mg Pb L <sup>-1</sup> |
|-------------------|---------------------|---------------------------|---------------------------|---------------------------|----------------------------|----------------------------|
| Coco Coir         | 300                 | 6.31                      | 5.43                      | 4.81                      | 4.35                       | 3.82                       |
| Coco Coir         | 350                 | 8.59                      | 8.34                      | 7.74                      | 7.15                       | 5.27                       |
| Coco Coir         | 400                 | 9.56                      | 9.34                      | 8.66                      | 7.15                       | 5.27                       |
| Coco Coir         | 450                 | 10.37                     | 10.27                     | 9.95                      | 8.99                       | 6.09                       |
| Coco Coir         | 500                 | 10.57                     | 10.41                     | 10.13                     | 9.59                       | 5.63                       |
| Coco Coir         | 550                 | 10.83                     | 10.73                     | 10.45                     | 10.13                      | 5.60                       |
| Coco Coir         | 600                 | 10.8                      | 10.67                     | 10.48                     | 10.23                      | 5.34                       |
| Coco Coir         | 650                 | 10.69                     | 10.63                     | 10.48                     | 10.36                      | 5.30                       |
| Coco Coir         | 700                 | 11.03                     | 10.96                     | 10.8                      | 10.62                      | 5.28                       |
| Coco Coir         | 750                 | 11.00                     | 11.00                     | 10.83                     | 10.66                      | 5.49                       |
| Hay               | 300                 | 6.23                      | 6.33                      | 5.66                      | 5.47                       | 4.36                       |
| Hay               | 350                 | 7.19                      | 7.23                      | 5.75                      | 5.89                       | 4.95                       |
| Hay               | 400                 | 8.23                      | 7.34                      | 7.99                      | 7.41                       | 5.10                       |
| Hay               | 450                 | 9.21                      | 9.12                      | 8.88                      | 8.22                       | 5.11                       |
| Hay               | 500                 | 9.74                      | 9.60                      | 9.27                      | 8.82                       | 5.11                       |
| Hay               | 550                 | 10.33                     | 10.30                     | 10.04                     | 9.63                       | 5.30                       |
| Hay               | 600                 | 10.46                     | 10.38                     | 10.16                     | 9.74                       | 5.28                       |
| Hay               | 650                 | 10.83                     | 10.78                     | 10.56                     | 10.14                      | 5.42                       |
| Hay               | 700                 | 11.04                     | 10.98                     | 10.83                     | 10.66                      | 6.06                       |
| Hay               | 750                 | 11.26                     | 11.17                     | 11.09                     | 10.87                      | 6.55                       |
| Wheat straw       | 300                 | 6.27                      | 6.13                      | 4.84                      | 4.63                       | 4.03                       |
| Wheat straw       | 350                 | 7.01                      | 7.41                      | 6.80                      | 6.47                       | 4.89                       |
| Wheat straw       | 400                 | 8.80                      | 8.63                      | 8.21                      | 7.40                       | 5.19                       |
| Wheat straw       | 450                 | 9.68                      | 9.50                      | 9.18                      | 8.52                       | 5.29                       |
| Wheat straw       | 500                 | 10.44                     | 10.37                     | 10.18                     | 9.68                       | 5.32                       |
| Wheat straw       | 550                 | 10.40                     | 10.32                     | 10.15                     | 9.69                       | 5.23                       |
| Wheat straw       | 600                 | 10.38                     | 10.31                     | 10.19                     | 9.85                       | 5.32                       |
| Wheat straw       | 650                 | 10.47                     | 10.40                     | 10.30                     | 9.96                       | 5.55                       |
| Wheat straw       | 700                 | 10.30                     | 10.24                     | 10.17                     | 9.93                       | 5.53                       |
| Wheat straw       | 750                 | 10.45                     | 10.38                     | 10.35                     | 10.4                       | 6.50                       |
| Pine bark         | 300                 | 4.26                      | 4.02                      | 3.32                      | 3.31                       | 3.04                       |
| Pine bark         | 350                 | 4.45                      | 4.30                      | 3.88                      | 3.81                       | 3.66                       |
| Pine bark         | 400                 | 4.71                      | 4.50                      | 4.19                      | 4.11                       | 4.02                       |
| Pine bark         | 450                 | 5.42                      | 5.14                      | 4.23                      | 4.64                       | 4.60                       |
| Pine bark         | 500                 | 6.03                      | 5.56                      | 5.01                      | 4.89                       | 4.74                       |
| Pine bark         | 550                 | 6.54                      | 6.01                      | 5.16                      | 5.03                       | 4.88                       |
| Pine bark         | 600                 | 7.21                      | 6.72                      | 5.36                      | 5.16                       | 5.13                       |
| Pine bark         | 650                 | 7.77                      | 7.26                      | 6.15                      | 5.30                       | 5.21                       |
| Pine bark         | 700                 | 8.85                      | 8.41                      | 7.21                      | 5.72                       | 5.80                       |
| Pine bark         | 750                 | 9.67                      | 9.36                      | 7.63                      | 6.61                       | 5.93                       |

**Table S-3. Biochar feedstock properties**

| Feedstock   | N (%) | C (%) | C/N ratio | Ca (mg/kg) | K (mg/kg) | Mg (mg/kg) | P (mg/kg) | S (mg/kg) | Na (mg/kg) | Al (mg/kg) | Fe (mg/kg) | Cu (mg/kg) | Pb (mg/kg) | Mn (mg/kg) | Zn (mg/kg) |
|-------------|-------|-------|-----------|------------|-----------|------------|-----------|-----------|------------|------------|------------|------------|------------|------------|------------|
| Hay         | 1.11  | 41.4  | 37.3      | 4490       | 16032     | 1303       | 2008      | 1308      | 996        | 53.3       | 87.3       | 3.40       | 1.14       | 27.2       | 19.7       |
| Wheat straw | 0.73  | 44.1  | 60.7      | 5361       | 8794      | 328        | 695       | 733       | 343        | 98.0       | 397        | 2.50       | 1.64       | 29.2       | 9.9        |
| Pine bark   | 0.09  | 45.9  | 534       | 1356       | 776       | 262        | 101       | 441       | 12         | 80.3       | 141        | 1.94       | 1.89       | 35.6       | 10.4       |
| Coco coir   | 0.44  | 44.2  | 101       | 2307       | 12584     | 1763       | 364       | 765       | 4046       | 660        | 1774       | 1.49       | 1.39       | 68.6       | 16.7       |

**Table S-4. The relationship between biochar feedstock properties and maximum possible Pb sorption capacity at optimum pyrolysis temperature**

| Feedstock property | R <sup>2</sup> | p-value |
|--------------------|----------------|---------|
| N                  | 0.954          | 0.023   |
| C                  | 0.813          | 0.099   |
| C/N ratio          | 0.863          | 0.071   |
| Ca                 | 0.782          | 0.116   |
| K                  | 0.759          | 0.129   |
| Mg                 | 0.135          | 0.633   |
| P                  | 0.706          | 0.160   |
| S                  | 0.763          | 0.127   |
| Na                 | 0.007          | 0.914   |
| Cu                 | 0.525          | 0.276   |
| Pb                 | 0.656          | 0.190   |
| Mn                 | 0.086          | 0.708   |
| Zn                 | 0.302          | 0.451   |
| Al                 | 0.016          | 0.872   |
| Fe                 | 0.006          | 0.920   |

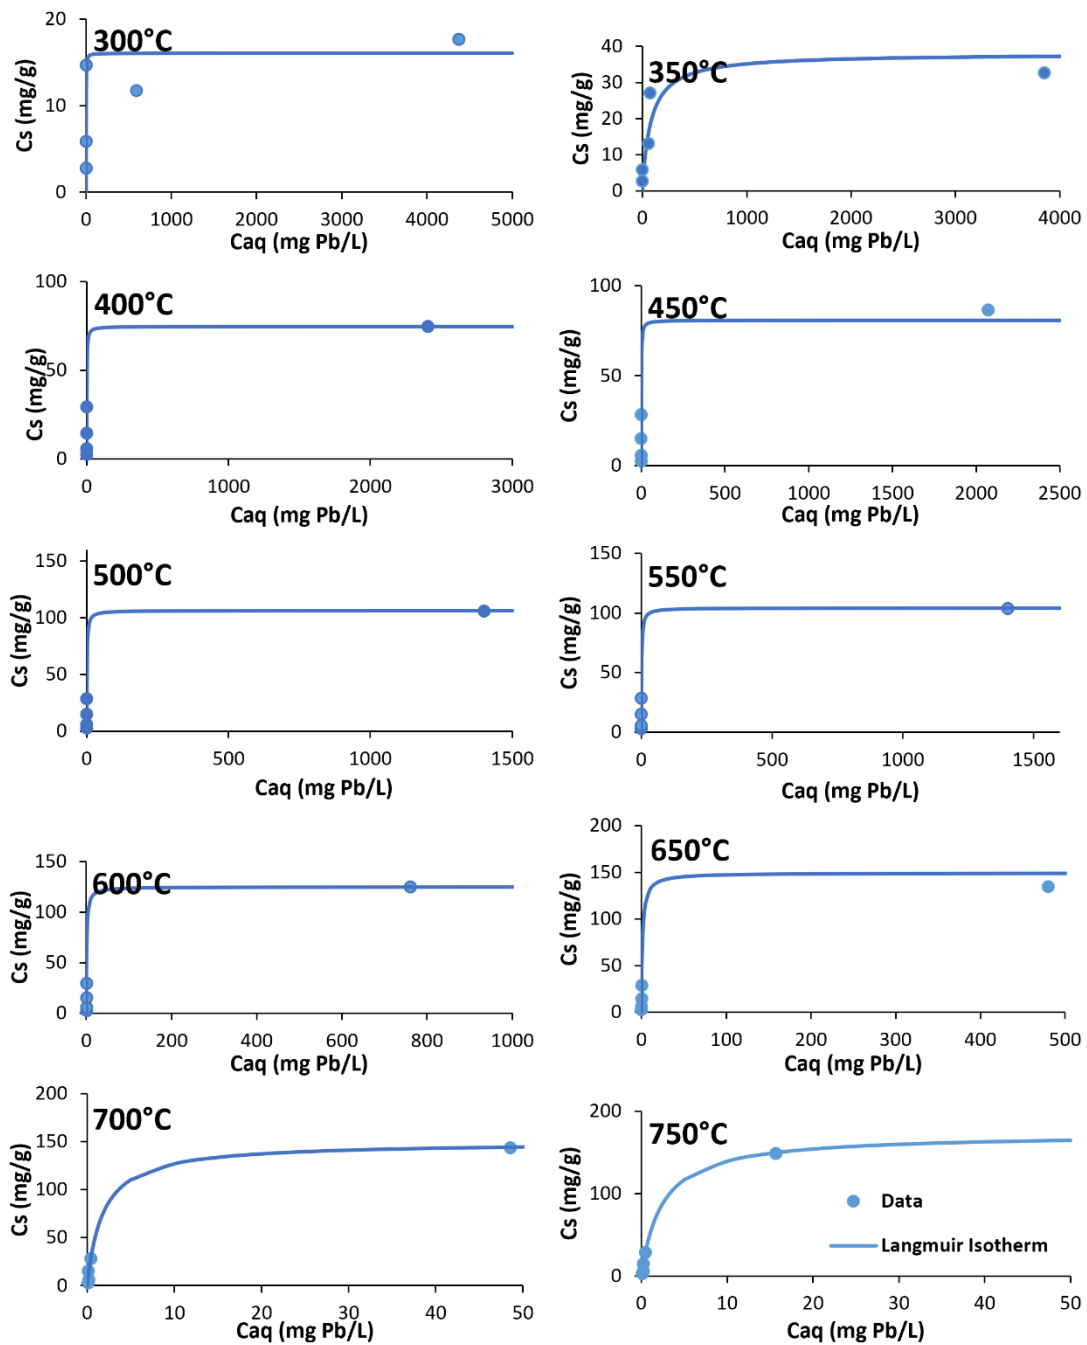

Figure S-1; Sorption isotherm for hay biochars pyrolyzed at 300 °C, 350 °C, 400 °C, 450 °C, 500 °C, 550 °C, 600 °C, 650 °C, 700 °C, and 750 °C shaken with 100, 200, 500, 1000, and 5000 mg/L of Pb and fitted to a Langmuir sorption isotherm model

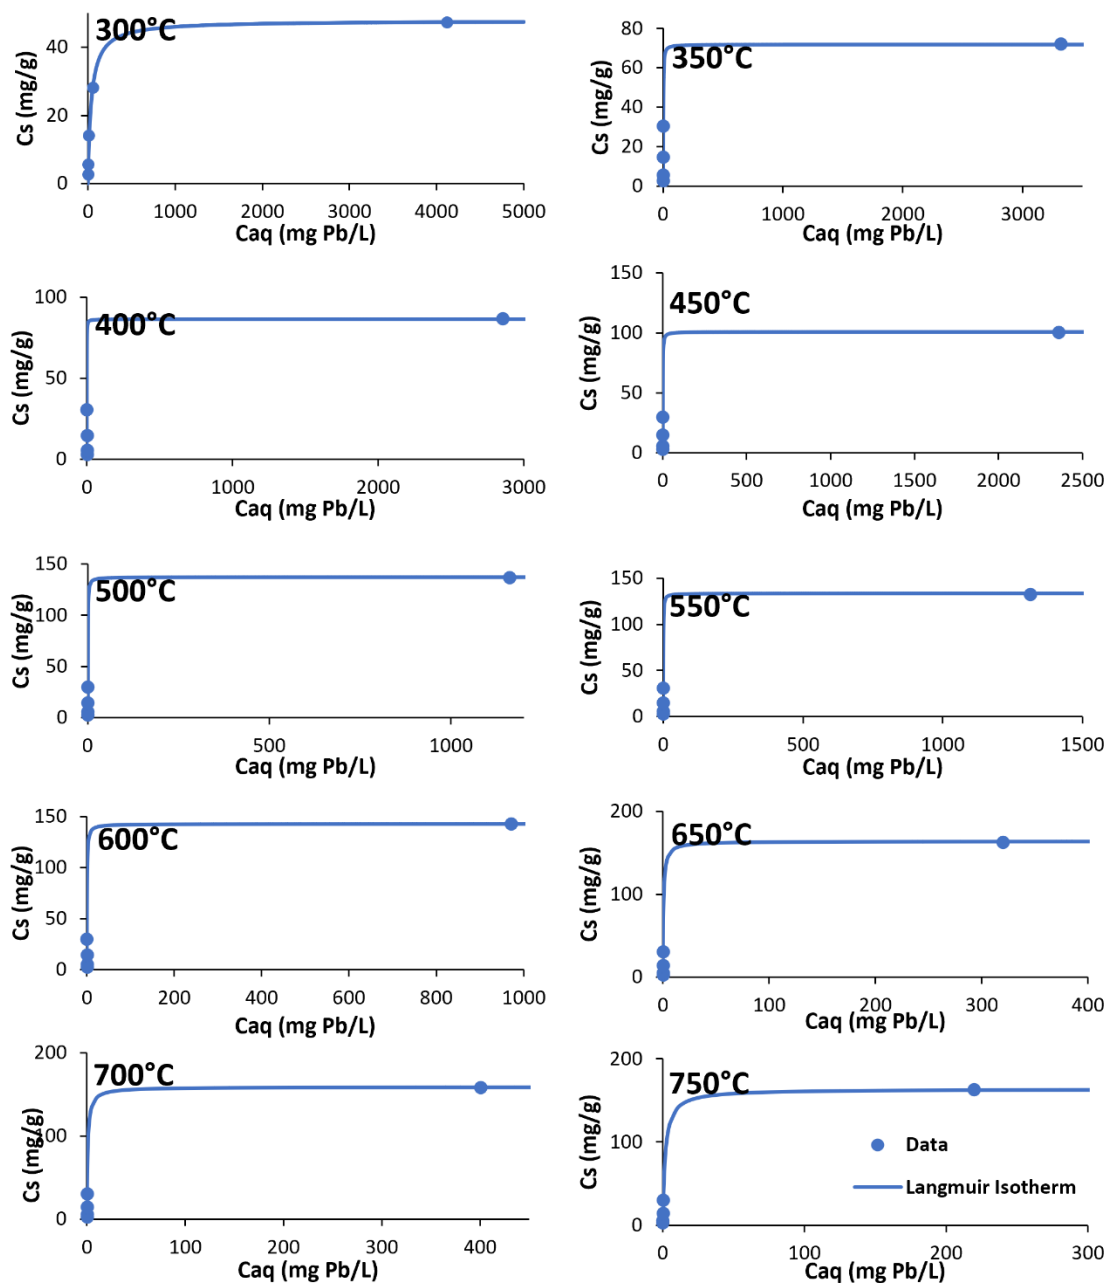

Figure S-2; Sorption isotherm for wheat straw biochars pyrolyzed at 300 °C, 350 °C, 400 °C, 450 °C, 500 °C, 550 °C, 600 °C, 650 °C, 700 °C, and 750 °C shaken with 100, 200, 500, 1000, and 5000 mg/L of Pb and fitted to a Langmuir sorption isotherm model



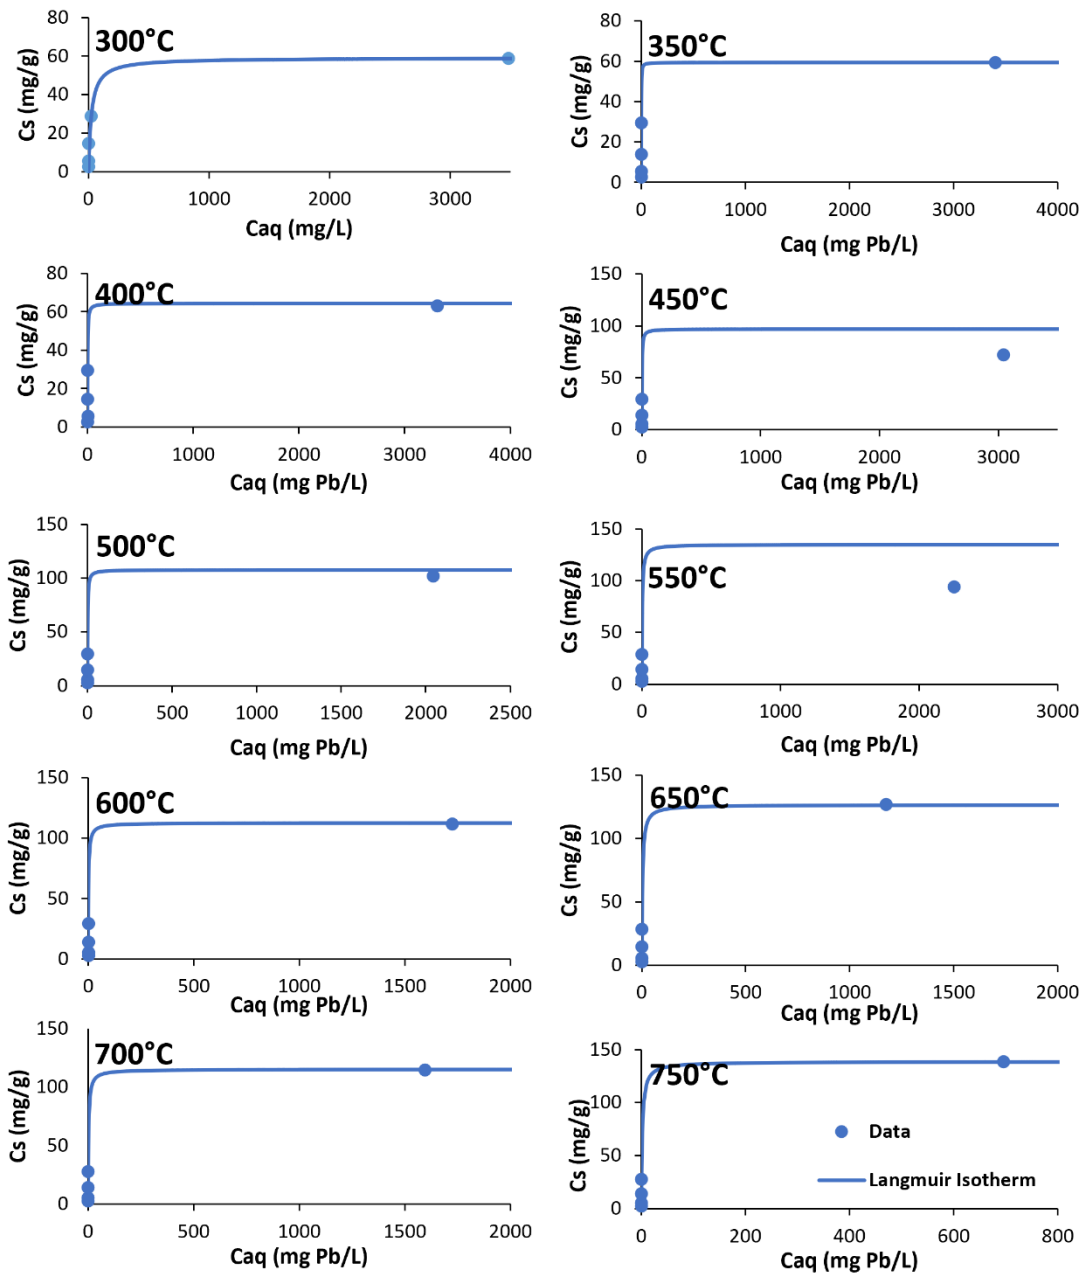

Figure S-3; Sorption isotherm for coco coir biochars pyrolyzed at 300 °C, 350 °C, 400 °C, 450 °C, 500 °C, 550 °C, 600 °C, 650 °C, 700 °C, and 750 °C shaken with 100, 200, 500, 1000, and 5000 mg/L of Pb and fitted to a Langmuir sorption isotherm model

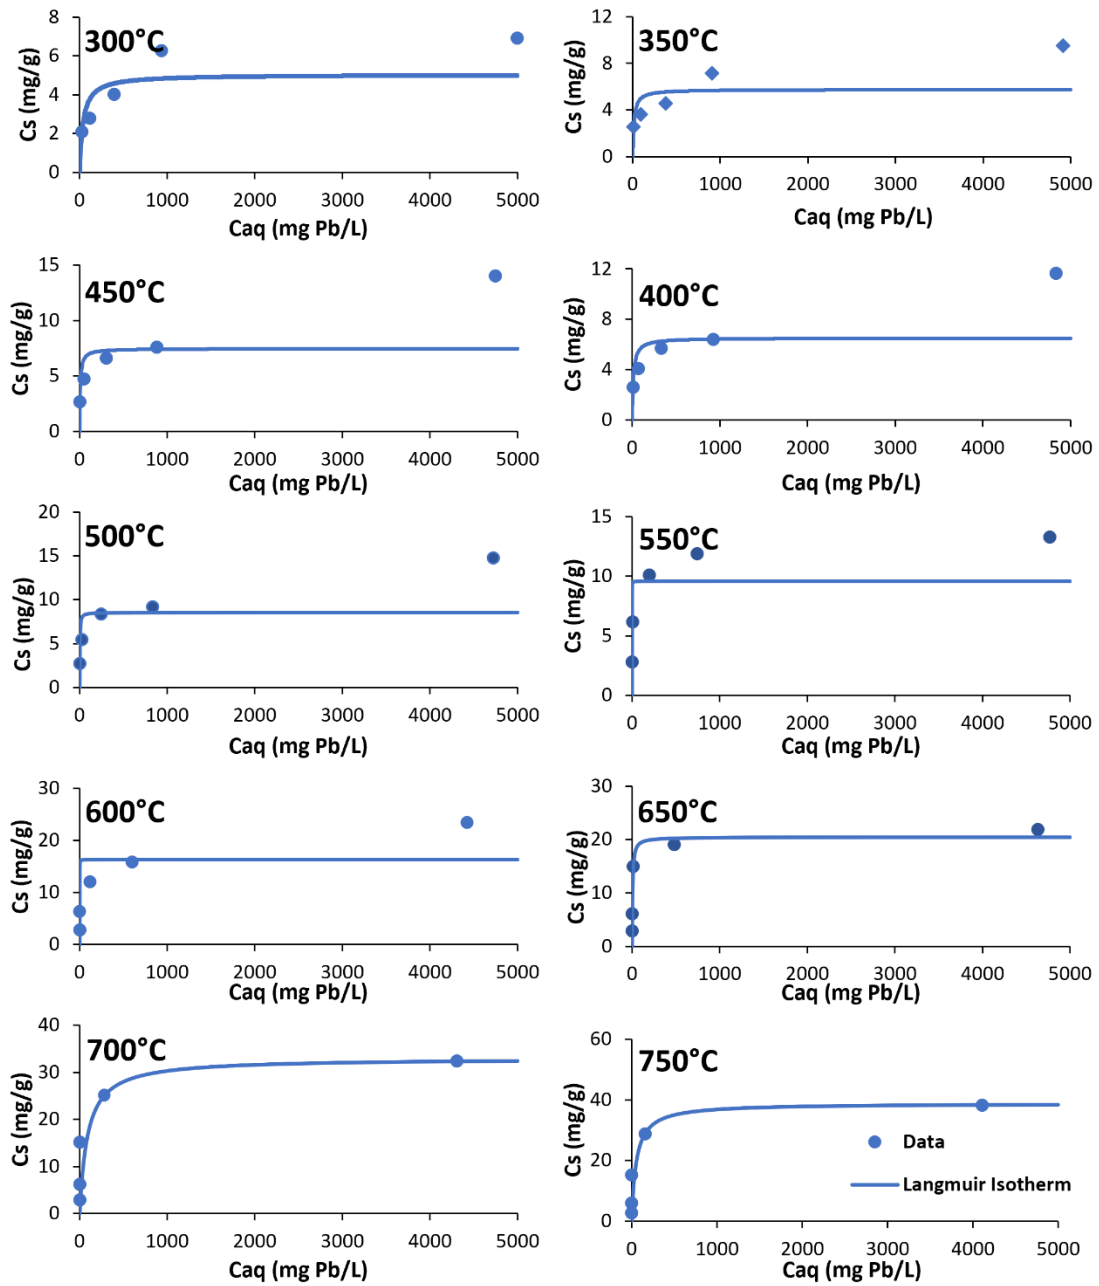

Figure S-4; Sorption isotherm for pine bark biochars pyrolyzed at 300 °C, 350 °C, 400 °C, 450 °C, 500 °C, 550 °C, 600 °C, 650 °C, 700 °C, and 750 °C shaken with 100, 200, 500, 1000, and 5000 mg/L of Pb and fitted to a Langmuir sorption isotherm model

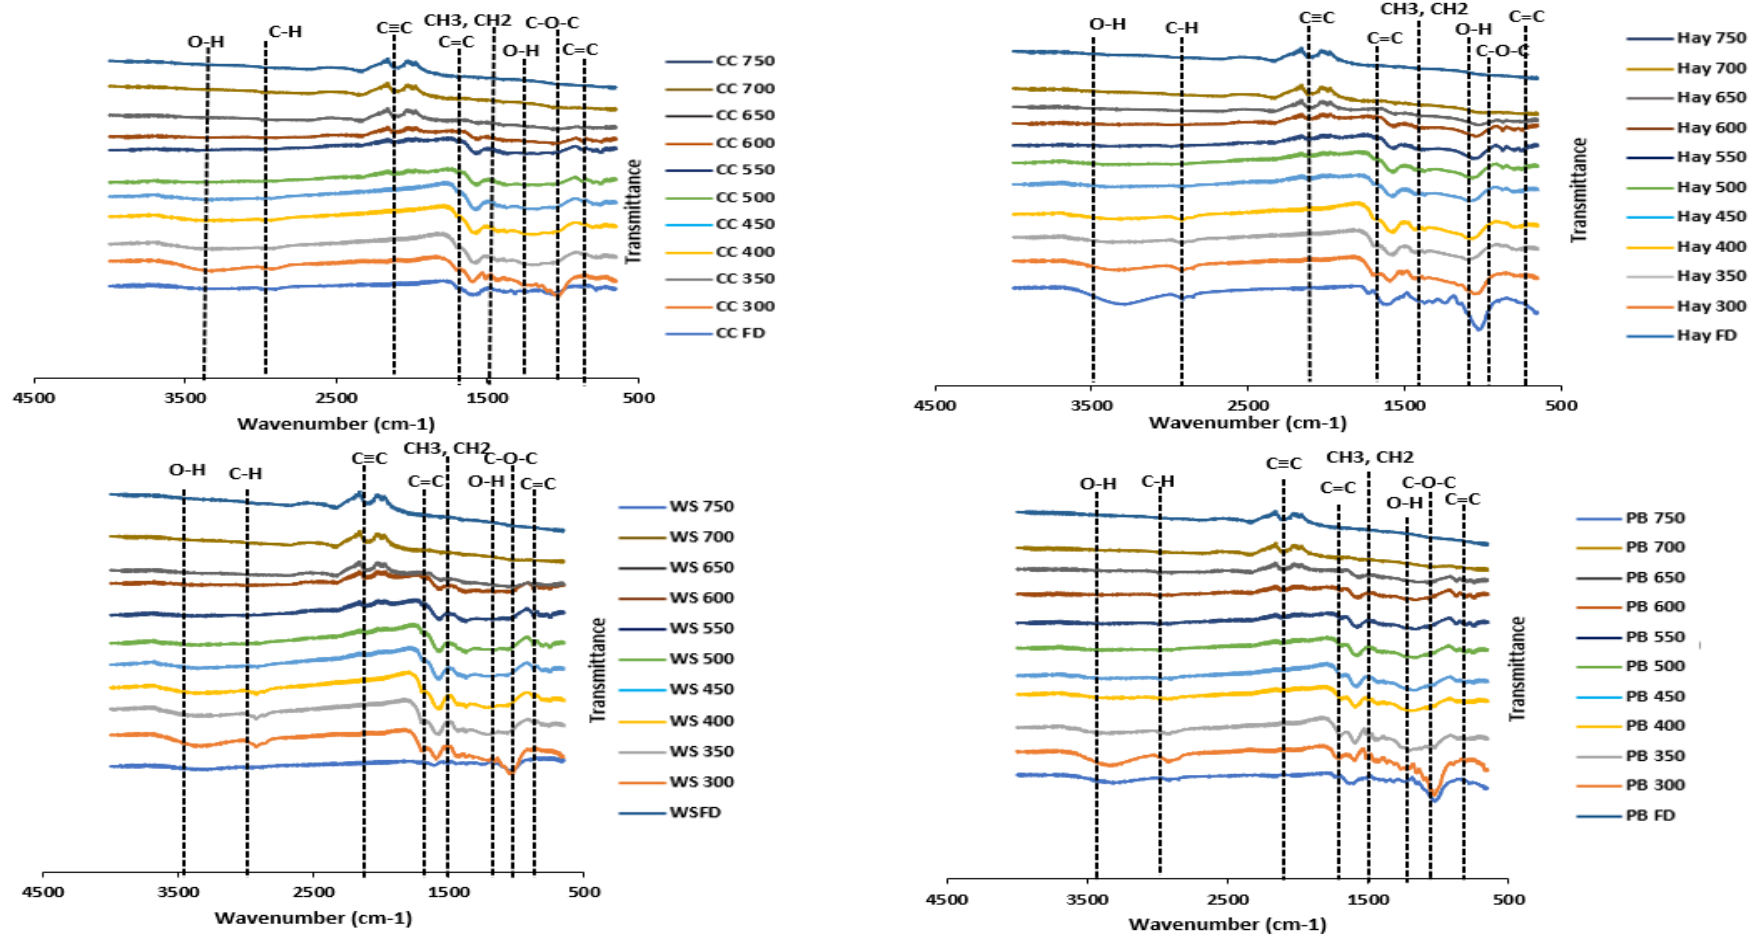

Figure S-5. FTIR spectra for feedstocks (FD) and biochars made from coco coir (CC), hay, wheat straw (WS), and pine bark (PB) at pyrolysis temperatures between 300°C and 750°C
